# Supplementary material for: Concerns, perceived need and competing priorities: a qualitative exploration of decision-making and non-participation in a population-based flexible sigmoidoscopy screening programme to prevent colorectal cancer
Source: PubMed Central journal article supplement (PMC5129085; doi:10.1136/bmjopen-2016-012304), 2016-11-11
Supplement: bmjopen-2016-012304supp_appendix.pdf [file bmjopen-2016-012304supp_appendix.pdf]

## Appendix 1 – Interview participant attributes (Non-screeners N=25)

(Strongly agree = ++; agree= +; disagree= - ; strongly disagree = --; x=missing or n/a)

| Sex | MDI rank (1-5) 5= most deprived | bowel cancer screening is important | I have concerning bowel symptoms | I was concerned about test | I was worried about what they might find | I am unable to have test for medical reasons | Previous cancer diagnosis | Cancer concern/susceptibility                                                                                                                                                                      | Main reported reason for non-screening                                                                                  | Would consider in future? |
|-----|---------------------------------|-------------------------------------|----------------------------------|----------------------------|------------------------------------------|----------------------------------------------|---------------------------|----------------------------------------------------------------------------------------------------------------------------------------------------------------------------------------------------|-------------------------------------------------------------------------------------------------------------------------|---------------------------|
| F   | X                               | ++                                  | +                                | +                          | +                                        | +                                            |                           | Family history cancer (bowel). Not very concerned as recently tested after presenting with symptoms.                                                                                               | Endoscopy 3 months earlier, didn't want to waste resources                                                              | ✓                         |
| F   | 2                               | +                                   | -                                | ++                         | -                                        | -                                            |                           | Grandfather had cancer (bowel). Some implied concern believes takes a long time to develop                                                                                                         | Embarrassment about test                                                                                                | ✓                         |
| M   | 2                               | +                                   | -                                | ++                         | ++                                       | -                                            |                           | Lost friends to cancer but no more concerned with possibility of bowel cancer than any other illness                                                                                               | Attended but unable to proceed to test due to fear about potential damage caused by scoping                             | ✓<br>Only if sedated      |
| F   | 3                               | x                                   | x                                | x                          | x                                        | x                                            |                           | No specific concern. Has many other more prominent health problems                                                                                                                                 | Not realised needed to confirm appointment                                                                              | ✓                         |
| F   | 2                               | ++                                  | +                                | --                         | --                                       | --                                           |                           | Lost 1 close friend to cancer (bowel), 1 had a diagnosis (bowel) but is fine and 1 is in terminal stages (bowel). High cancer concern and has current symptoms. Screening would offer reassurance. | Recent endoscopy after bowel change and bleeding                                                                        | ✓                         |
| F   | x                               | x                                   | x                                | x                          | x                                        | x                                            |                           | No specific concern                                                                                                                                                                                | Hadn't realised needed to call to confirm                                                                               | ✓                         |
| F   | 3                               | ++                                  | --                               | +                          | +                                        | --                                           |                           | No specific concern                                                                                                                                                                                | First appointment cancelled by screening centre. Appointment rebooked but clashed with hip operation                    | ✓                         |
| M   | 1                               | x                                   | x                                | x                          | x                                        | x                                            |                           | No specific concern                                                                                                                                                                                | Recently had a colonoscopy. Phoned and advised screening not needed. Would prefer to let someone else have appointment. | ✓                         |
| F   | 5                               | ++                                  | --                               | +                          | +                                        | --                                           |                           | Family history of cancer (breast).                                                                                                                                                                 | Unable to get time off work to attend                                                                                   | ✓                         |

| Sex | MDI rank (1-5) 5= most deprived | bowel cancer screening is important | I have concerning bowel symptoms | I was concerned about test | I was worried about what they might find | I am unable to have test for medical reasons | Previous cancer diagnosis | Cancer concern/susceptibility                                                           | Main reported reason for non-screening                                                                                                                              | Would consider in future? |
|-----|---------------------------------|-------------------------------------|----------------------------------|----------------------------|------------------------------------------|----------------------------------------------|---------------------------|-----------------------------------------------------------------------------------------|---------------------------------------------------------------------------------------------------------------------------------------------------------------------|---------------------------|
| F   | 3 (+)                           | ++                                  | -                                | -                          | +                                        | --                                           |                           | Strong family history (bowel) and high cancer concern                                   | Unable to attend appointment due to caring responsibilities                                                                                                         | ✓                         |
| F   | 2                               | ++                                  | -                                | +                          | -                                        | -                                            |                           | No specific concern                                                                     | Chronic illness affects ability to get to hospital                                                                                                                  | ✓                         |
| F   | 1                               | +                                   | --                               | +                          | -                                        | -                                            |                           | No specific concern                                                                     | Potential risk of test. Undergoing other medical treatment.                                                                                                         | ✓                         |
| M   | 2                               | ++                                  | -                                | -                          | -                                        | --                                           |                           | No specific concern                                                                     | Life too chaotic following marriage breakdown                                                                                                                       | ✓                         |
| F   | 1                               | ++                                  | --                               | --                         | --                                       | --                                           |                           | Lost father to suspected cancer. Hadn't considered own susceptibility. Lives healthily. | All seemed too messy and inconvenient. Couldn't administer the enema at work                                                                                        | ?                         |
| F   | 1                               | ++                                  | -                                | --                         | x                                        | -                                            |                           | No specific concern                                                                     | Panic about hospitals. Last scope 2 years ago was painful. Couldn't administer own enema. No opportunities for sedation.                                            | ?                         |
| F   | 3                               | ++                                  | +                                | --                         | --                                       | --                                           |                           | 2 friends with cancer and good recovery. Feels less at risk as eats healthily.          | Unable to administer the enema on own due to MS and appointment not convenient, No chances to reschedule.                                                           | ?                         |
| F   | 2                               | +                                   | -                                | +                          | -                                        | -                                            |                           | No specific concern                                                                     | Does not feel unhealthy                                                                                                                                             | ?                         |
| F   | 2                               | +                                   | --                               | +                          | -                                        | --                                           |                           | No concern. Feels safe in own self care and awareness                                   | Friends reported bad experience. Has ongoing health issues relating to cirrhosis and does not wish to risk complications due to caring responsibilities for mother. | X                         |
| F   | 1                               | ++                                  | -                                | --                         | x                                        | -                                            |                           | No specific concern                                                                     | Fear of hospitals. Complicated medical history and sigmoidoscopy 2 years earlier.                                                                                   | X                         |

| Sex | MDI rank (1-5) 5= most deprived | bowel cancer screening is important | I have concerning bowel symptoms | I was concerned about test | I was worried about what they might find | I am unable to have test for medical reasons | Previous cancer diagnosis | Cancer concern/susceptibility                                                                                               | Main reported reason for non-screening                                                                                                                      | Would consider in future? |
|-----|---------------------------------|-------------------------------------|----------------------------------|----------------------------|------------------------------------------|----------------------------------------------|---------------------------|-----------------------------------------------------------------------------------------------------------------------------|-------------------------------------------------------------------------------------------------------------------------------------------------------------|---------------------------|
| F   | 5                               | +                                   | -                                | +                          | +                                        | -                                            | ✓                         | Lost mother to breast cancer. High concern.                                                                                 | Has other conflicting responsibilities and concerns about intrusiveness of test                                                                             | X                         |
| F   | 2                               | +                                   | (ongoing bowel sx)               | +                          | -                                        | -                                            |                           | Lost 1 friend recently and 1 currently in palliative care (both bowel ca). Currently on mind and has ongoing bowel symptoms | Main reason was the fear of harm/damage. Also belief that bowel cancer is hard to treat.                                                                    | X                         |
| F   | 1                               | +                                   | --                               | ++                         | -                                        | --                                           |                           | No specific concern                                                                                                         | Not realising what test involves until enema arrived in post.                                                                                               | X                         |
| F   | 1                               | +                                   | --                               | ++                         | --                                       | --                                           |                           | <b>Lost father to cancer (bowel ca).</b>                                                                                    | Not convinced by statistics provided or that benefits outweigh invasiveness of test. Feels treatment can prolong suffering. Attends other cancer screening. | X                         |
| M   | 4                               | +                                   | -                                | +                          | +                                        | --                                           |                           | Lost both parents (mother OG ca). High cancer concern.                                                                      | Initially, appointment during holiday. Then decided he does not want to know if cancer.                                                                     | X                         |
| M   | 3 (+)                           | +                                   | --                               | +                          | -                                        | --                                           |                           | Father (prostate ca) but low bowel cancer concern.                                                                          | Unpleasantness of FSIG                                                                                                                                      | X                         |

## Appendix 2 – Interview participant attributes (Screeners N=20)

(Strongly agree = ++; agree= +; disagree= - ; strongly disagree = --; X=missing or n/a)

| Sex | MDI rank (1-5) 5= most deprived | bowel cancer screening is important | I have concerning bowel symptoms | I was concerned about test | I was worried about what they might find | Previous cancer diagnosis | Cancer concern/susceptibility                                                                                      | Main reported reason for screening                                  |
|-----|---------------------------------|-------------------------------------|----------------------------------|----------------------------|------------------------------------------|---------------------------|--------------------------------------------------------------------------------------------------------------------|---------------------------------------------------------------------|
| M   | 1                               | ++                                  | --                               | +                          | +                                        | ✓                         | High cancer concern                                                                                                | Had cancer before and knows benefits of catching things early       |
| M   | 1                               | ++                                  | ++                               | +                          | ++                                       |                           | Family history of bowel cancer (father and grandfather ). High concern and recently presented to GP with symptoms. | To put mind at rest                                                 |
| M   | 2                               | +                                   | -                                | +                          | +                                        |                           | Cousin diagnosed with cancer (bowel) and friend. No particular concern but experienced bleeding from haemorrhoids. | Wants peace of mind                                                 |
| M   | 1                               | ++                                  | +                                | +                          | +                                        |                           | Brother in law and friend with bowel cancer with different outcomes.                                               | Importance of finding early/reassurance.                            |
| M   | 1                               | ++                                  | --                               | +                          | +                                        |                           | No specific concerns, feels well.                                                                                  | Would prefer to know than not. Seemed sensible approach.            |
| M   | 1                               | ++                                  | -                                | +                          | -                                        | ✓                         | High awareness due to own cancer and concerned may have a problem and not know.                                    | Own cancer and awareness of the importance of catching early.       |
| F   | 2                               | ++                                  | +                                | +                          | +                                        |                           | Uncle with cancer (bowel). High concern due to family history and own symptoms                                     | Wanted reassurance due to uncle's diagnosis and own symptoms.       |
| F   | 1                               | ++                                  | +                                | +                          | -                                        |                           | High concern due to previous polyps.                                                                               | Opportunity for reassurance due to previous polyps.                 |
| F   | 1                               | ++                                  | -                                | +                          | -                                        | ✓                         | Some concern.                                                                                                      | Opportunity to catch anything early and better chances of survival. |

|          |   |    |    |    |    |                                                                                                                                                                                                   |                                                                                                                                                 |
|----------|---|----|----|----|----|---------------------------------------------------------------------------------------------------------------------------------------------------------------------------------------------------|-------------------------------------------------------------------------------------------------------------------------------------------------|
| <b>F</b> | 2 | ++ | -  | +  | ++ | Lost mother (bowel ca). Concerned about family history.                                                                                                                                           | Concern family history and opportunity for reassurance.                                                                                         |
| <b>F</b> | 2 | ++ | -  | ++ | +  | Mother diagnosed with cancer (bowel) and father (bladder). High cancer concern                                                                                                                    | Didn't want to miss opportunity for reassurance and importance of catching it early. Encouraging people to go for screening is part of her job. |
| <b>F</b> | 3 | ++ | +  | +  | ++ | ✓ Feels susceptible to any cancer and aware of previous rectal bleeding                                                                                                                           | For peace of mind. Has had previous rectal bleeding.                                                                                            |
| <b>F</b> | 5 | ++ | +  | +  | +  | No specific concern.                                                                                                                                                                              | Aware of bowel symptoms, and prefer to find out and catch it early.                                                                             |
| <b>M</b> | 1 | ++ | -  | +  | +  | No specific concern                                                                                                                                                                               | Importance of catching early. Responsible use of resources. Benefits outweigh the unpleasantness.                                               |
| <b>M</b> | 3 | ++ | -- | -  | -  | Lost father to cancer (bowel). High cancer concern and experienced symptoms                                                                                                                       | Positive about opportunity. Wanted reassurance as feels susceptible.                                                                            |
| <b>F</b> | 3 | ++ | +  | ++ | -  | Aunt diagnosed cancer (bowel) and mother (bladder). Lost friend to cancer (breast). Concerned about susceptibility and symptoms. Does not feel at any higher risk than others, can strike anyone. | Reassurance about ongoing bowel changes, experience of close relative with bowel cancer.                                                        |
| <b>F</b> | 3 | ++ | -- | x  | +  | Lost brother to cancer (bowel). High cancer concern                                                                                                                                               | Thought it was a recall for genetic screening. Wanted reassurance.                                                                              |
| <b>M</b> | 3 | ++ | ++ | ++ | +  | Mother and father in law died ca and friends at work. General cancer concern.                                                                                                                     | Wanted peace of mind. Prevention better than cure.                                                                                              |
| <b>M</b> | 3 | ++ | -- | +  | ++ | ✓ No specific bowel cancer concern until screening invite, but ongoing cancer treatment.                                                                                                          | Thought appointment was related to ongoing cancer investigations/treatment. Good to have reassurance                                            |
| <b>F</b> | 1 | +  | +  | ++ | +  | Lost 1 friend to cancer (breast) and another had a good outcome. Mother recently had precancerous polyp removed.                                                                                  | Conscious about bowel cancer, glad for reassurance and good opportunity.                                                                        |
